# Supplementary material for: Microbial co-occurrence patterns in deep Precambrian bedrock fracture fluids
Source: Copernicus journal article supplement (doi:10.5194/bg-13-3091-2016), 2016-05-30
Supplement: Supplementary file 1 [file bg-13-3091-2016-supplement.zip]

Supplementary Tables:

Supplementary Table 1. The copy numbers of *dsrB* and *mcrA* genes in Outokumpu fractures.

| Fracture<br>depth m | <i>dsrB</i> |                  |          |                  | <i>mcrA</i> |                  |          |                  |
|---------------------|-------------|------------------|----------|------------------|-------------|------------------|----------|------------------|
|                     | DNA         | SEM <sup>1</sup> | RNA      | SEM <sup>1</sup> | DNA         | SEM <sup>1</sup> | RNA      | SEM <sup>1</sup> |
| 180                 | 5,92E+02    | 4,55E+02         | 5,82E+00 | 1,05E+00         | 3,42E+01    | 8,51E+00         | 8,34E+00 | 6,55E+00         |
| 500                 | 7,39E+03    | 1,79E+03         | 8,28E+01 | 3,51E+01         | 3,73E+01    | 1,83E+01         | b.d      | n.a              |
| 967                 | 1,52E+01    | 7,31E-01         | 2,77E+00 | 4,42E-02         | 3,07E+01    | 0,00E+00         | 2,05E+02 | 1,02E+02         |
| 1820                | 2,96E+02    | 1,86E+01         | 7,07E+02 | 1,44E+01         | b.d         | n.a              | b.d      | n.a              |
| 2260                | 4,98E+02    | 2,26E+02         | 3,82E+01 | 8,51E+00         | b.d         | n.a              | b.d      | n.a              |
| 2300                | 3,29E+02    | 3,54E+01         | 6,01E+02 | 3,52E+01         | b.d         | n.a              | b.d      | n.a              |

<sup>1</sup>SEM = standard error of mean

b.d = below detection limit

n.a = not available

Supplementary Table 2. The phylogenetic affiliation and relative abundance of the bacterial OTUs representing more than 0,1% abundance in the communities in the six fractures.

→ as .zip

Supplementary Table 3. The phylogenetic affiliation of archaeal OTUs and their relative abundance in the communities in Outokumpu fractures.

→ as .zip

Supplementary Table 4. The diversity and richness indexes of the communities and sequencing coverage of A) bacteria and B) archaea.

A)

BACTERIA

|                  | 180 m |     | 500 m |     | 967 m |     | 1820 m |     | 2260 m |     | 2300 m |     |
|------------------|-------|-----|-------|-----|-------|-----|--------|-----|--------|-----|--------|-----|
| Diversity index  | DNA   | RNA | DNA   | RNA | DNA   | RNA | DNA    | RNA | DNA    | RNA | DNA    | RNA |
| Shannon H'       | 2.9   | 2.6 | 3.4   | 4.9 | 5.3   | 5.1 | 6.3    | 3.5 | 2.7    | 5.1 | 6.3    | 1.8 |
| Chao1            | 208   | 125 | 428   | 461 | 326   | 363 | 523    | 538 | 394    | 492 | 495    | 209 |
| Observed %       |       |     |       |     |       |     |        |     |        |     |        |     |
| Chao             | 69    | 72  | 77    | 86  | 84    | 88  | 83     | 77  | 73     | 91  | 86     | 56  |
| Observed species | 143   | 90  | 329   | 395 | 274   | 318 | 432    | 412 | 286    | 446 | 424    | 116 |

B)

ARCHAEA

|                  | 180 m |     | 500 m |     | 967 m |     | 1820 m |     | 2260 m |     | 2300 m |     |
|------------------|-------|-----|-------|-----|-------|-----|--------|-----|--------|-----|--------|-----|
| Diversity index  | DNA   | RNA | DNA   | RNA | DNA   | RNA | DNA    | RNA | DNA    | RNA | DNA    | RNA |
| Shannon H'       | 2.4   | 2.1 | 0.9   | 0.8 | 2.3   | 1.2 | n.d    | n.d | 0.6    | 0.8 | 0.8    | n.d |
| Chao1            | 45    | 32  | 3     | 3   | 58    | 32  | n.d    | n.d | 7      | 8   | 5      | n.d |
| Observed %       |       |     |       |     |       |     |        |     |        |     |        |     |
| Chao             | 98    | 92  | 100   | 100 | 100   | 94  | n.a    | n.a | 100    | 97  | 80     | n.a |
| Observed species | 44    | 29  | 3     | 3   | 58    | 30  | n.d    | n.d | 7      | 8   | 4      | n.d |

n.d = not detected

n.a = not available

Supplementary Table 5. The average nearest sequenced taxon indexes of bacterial and archaeal communities in Outokumpu bedrock fractures.

|          | 180 m |      | 500 m |      | 967 m |      | 1820 m |      | 2260 m |      | 2300 m |      |
|----------|-------|------|-------|------|-------|------|--------|------|--------|------|--------|------|
|          | DNA   | RNA  | DNA   | RNA  | DNA   | RNA  | DNA    | RNA  | DNA    | RNA  | DNA    | RNA  |
| Bacteria | 0.22  | 0.10 | 0.13  | 0.07 | 0.21  | 0.10 | 0.07   | 0.07 | 0.30   | 0.24 | 0.07   | 0.12 |
| Archaea  | 0.04  | 0.07 | 0.05  | 0.05 | 0.29  | 0.04 | n.a    | n.a  | 0.04   | 0.04 | 0.04   | n.a  |

Supplementary Table 6. The abundance of amino acid metabolism, carbon metabolism and energy metabolism genes predicted from metagenomes of (A) bacteria and (B) archaea.

|                                                     | 180<br>m<br>DNA | 180<br>m<br>RNA | 500<br>m<br>DNA | 500<br>m<br>RNA | 967<br>m<br>DNA | 967<br>m<br>RNA | 1820<br>m<br>DNA | 1820<br>m<br>RNA | 2260<br>m<br>DNA | 2260<br>m<br>RNA | 2300<br>m<br>DNA |
|-----------------------------------------------------|-----------------|-----------------|-----------------|-----------------|-----------------|-----------------|------------------|------------------|------------------|------------------|------------------|
| <b>A) Bacteria</b>                                  |                 |                 |                 |                 |                 |                 |                  |                  |                  |                  |                  |
| <b>Amino acid metabolism</b>                        |                 |                 |                 |                 |                 |                 |                  |                  |                  |                  |                  |
| Amino acid related enzymes                          | 14%             | 15%             | 13%             | 11%             | 12%             | 12%             | 11%              | 11%              | 11%              | 13%              | 11%              |
| Arginine and proline metabolism                     | 12%             | 12%             | 12%             | 11%             | 11%             | 13%             | 11%              | 12%              | 12%              | 11%              | 12%              |
| Valine, leucine and isoleucine degradation          | 5%              | 4%              | 10%             | 11%             | 10%             | 7%              | 11%              | 9%               | 10%              | 10%              | 10%              |
| Glycine, serine and threonine metabolism            | 9%              | 9%              | 9%              | 10%             | 8%              | 9%              | 8%               | 8%               | 8%               | 9%               | 9%               |
| Alanine, aspartate and glutamate metabolism         | 11%             | 11%             | 8%              | 8%              | 8%              | 9%              | 8%               | 9%               | 8%               | 7%               | 8%               |
| Tryptophan metabolism                               | 3%              | 3%              | 7%              | 8%              | 6%              | 4%              | 7%               | 6%               | 7%               | 7%               | 7%               |
| Cysteine and methionine metabolism                  | 8%              | 9%              | 7%              | 6%              | 7%              | 9%              | 7%               | 8%               | 8%               | 7%               | 7%               |
| Valine, leucine and isoleucine biosynthesis         | 7%              | 7%              | 6%              | 6%              | 7%              | 7%              | 6%               | 8%               | 7%               | 7%               | 6%               |
| Lysine degradation                                  | 2%              | 2%              | 6%              | 7%              | 5%              | 4%              | 6%               | 5%               | 5%               | 6%               | 6%               |
| Phenylalanine, tyrosine and tryptophan biosynthesis | 9%              | 9%              | 5%              | 5%              | 7%              | 8%              | 6%               | 6%               | 7%               | 5%               | 6%               |
| Histidine metabolism                                | 7%              | 7%              | 5%              | 5%              | 6%              | 5%              | 5%               | 5%               | 6%               | 5%               | 5%               |
| Lysine biosynthesis                                 | 8%              | 8%              | 5%              | 5%              | 6%              | 6%              | 5%               | 6%               | 5%               | 6%               | 5%               |
| Tyrosine metabolism                                 | 3%              | 3%              | 4%              | 4%              | 4%              | 3%              | 5%               | 3%               | 3%               | 4%               | 5%               |
| Phenylalanine metabolism                            | 2%              | 2%              | 3%              | 4%              | 4%              | 3%              | 4%               | 3%               | 4%               | 3%               | 4%               |
| <b>Carbohydrate metabolism</b>                      |                 |                 |                 |                 |                 |                 |                  |                  |                  |                  |                  |
| Propanoate metabolism                               | 6%              | 7%              | 11%             | 13%             | 11%             | 10%             | 12%              | 11%              | 11%              | 11%              | 12%              |
| Butanoate metabolism                                | 7%              | 8%              | 11%             | 13%             | 12%             | 10%             | 13%              | 11%              | 12%              | 12%              | 13%              |
| Pyruvate metabolism                                 | 10%             | 11%             | 12%             | 12%             | 12%             | 12%             | 12%              | 11%              | 12%              | 11%              | 12%              |
| Glycolysis / Gluconeogenesis                        | 10%             | 11%             | 11%             | 10%             | 10%             | 11%             | 10%              | 11%              | 13%              | 11%              | 10%              |
| Glyoxylate and dicarboxylate metabolism             | 6%              | 7%              | 9%              | 10%             | 9%              | 7%              | 9%               | 8%               | 6%               | 10%              | 10%              |
| Amino sugar and nucleotide sugar metabolism         | 13%             | 12%             | 8%              | 8%              | 9%              | 10%             | 8%               | 12%              | 9%               | 8%               | 8%               |
| Citrate cycle (TCA cycle)                           | 9%              | 8%              | 7%              | 7%              | 9%              | 10%             | 8%               | 10%              | 11%              | 10%              | 8%               |
| Pentose phosphate pathway                           | 6%              | 8%              | 7%              | 6%              | 6%              | 7%              | 6%               | 6%               | 7%               | 6%               | 6%               |
| Fructose and mannose metabolism                     | 6%              | 7%              | 5%              | 5%              | 5%              | 5%              | 5%               | 5%               | 6%               | 5%               | 5%               |
| Starch and sucrose metabolism                       | 8%              | 6%              | 4%              | 4%              | 5%              | 6%              | 4%               | 4%               | 2%               | 4%               | 4%               |
| Pentose and glucuronate interconversions            | 4%              | 4%              | 4%              | 4%              | 3%              | 3%              | 3%               | 2%               | 3%               | 3%               | 3%               |
| C5-Branched dibasic acid metabolism                 | 3%              | 3%              | 2%              | 3%              | 3%              | 4%              | 3%               | 3%               | 2%               | 3%               | 3%               |
| Galactose metabolism                                | 7%              | 4%              | 3%              | 2%              | 3%              | 3%              | 3%               | 3%               | 2%               | 2%               | 2%               |
| Inositol phosphate metabolism                       | 1%              | 2%              | 2%              | 2%              | 1%              | 2%              | 2%               | 1%               | 2%               | 2%               | 2%               |
| Ascorbate and aldarate metabolism                   | 1%              | 1%              | 2%              | 2%              | 2%              | 1%              | 2%               | 2%               | 1%               | 2%               | 2%               |
| <b>Energy metabolism</b>                            |                 |                 |                 |                 |                 |                 |                  |                  |                  |                  |                  |
| Oxidative phosphorylation                           | 24%             | 20%             | 22%             | 22%             | 22%             | 21%             | 24%              | 28%              | 26%              | 27%              | 24%              |
| Carbon fixation pathways in prokaryotes             | 20%             | 19%             | 18%             | 20%             | 22%             | 22%             | 21%              | 21%              | 22%              | 17%              | 20%              |
| Methane metabolism                                  | 20%             | 21%             | 17%             | 18%             | 17%             | 22%             | 18%              | 18%              | 23%              | 16%              | 18%              |
| Nitrogen metabolism                                 | 11%             | 14%             | 14%             | 17%             | 13%             | 15%             | 15%              | 11%              | 8%               | 11%              | 16%              |
| Carbon fixation in photosynthetic organisms         | 9%              | 9%              | 10%             | 8%              | 9%              | 7%              | 7%               | 8%               | 8%               | 9%               | 8%               |
| Photosynthesis proteins                             | 6%              | 7%              | 8%              | 6%              | 6%              | 4%              | 5%               | 5%               | 5%               | 8%               | 5%               |
| Sulfur metabolism                                   | 4%              | 4%              | 5%              | 5%              | 6%              | 5%              | 6%               | 4%               | 2%               | 5%               | 6%               |

|                                                     |                 |                 |                 |                 |                 |                 |                  |                  |                  |                  |                  |
|-----------------------------------------------------|-----------------|-----------------|-----------------|-----------------|-----------------|-----------------|------------------|------------------|------------------|------------------|------------------|
| Photosynthesis                                      | 6%              | 6%              | 6%              | 4%              | 5%              | 4%              | 4%               | 5%               | 5%               | 8%               | 4%               |
|                                                     | 180<br>m<br>DNA | 180<br>m<br>RNA | 500<br>m<br>DNA | 500<br>m<br>RNA | 967<br>m<br>DNA | 967<br>m<br>RNA | 1820<br>m<br>DNA | 1820<br>m<br>RNA | 2260<br>m<br>DNA | 2260<br>m<br>RNA | 2300<br>m<br>DNA |
| <b>B) Archaea</b>                                   |                 |                 |                 |                 |                 |                 |                  |                  |                  |                  |                  |
| <b>Amino acid metabolism</b>                        |                 |                 |                 |                 |                 |                 |                  |                  |                  |                  |                  |
| Amino acid related enzymes                          | 16%             | 16%             | 17%             | 17%             | 17%             | 16%             |                  |                  | 16%              | 16%              | 16%              |
| Valine, leucine and isoleucine biosynthesis         | 12%             | 12%             | 13%             | 13%             | 9%              | 12%             |                  |                  | 12%              | 12%              | 12%              |
| Phenylalanine, tyrosine and tryptophan biosynthesis | 11%             | 11%             | 11%             | 11%             | 12%             | 11%             |                  |                  | 11%              | 11%              | 11%              |
| Arginine and proline metabolism                     | 10%             | 10%             | 9%              | 9%              | 11%             | 11%             |                  |                  | 11%              | 11%              | 11%              |
| Cysteine and methionine metabolism                  | 9%              | 8%              | 8%              | 8%              | 9%              | 9%              |                  |                  | 9%               | 9%               | 9%               |
| Alanine, aspartate and glutamate metabolism         | 9%              | 9%              | 9%              | 9%              | 11%             | 9%              |                  |                  | 9%               | 9%               | 9%               |
| Lysine biosynthesis                                 | 8%              | 9%              | 9%              | 9%              | 7%              | 8%              |                  |                  | 8%               | 8%               | 8%               |
| Glycine, serine and threonine metabolism            | 7%              | 8%              | 8%              | 8%              | 8%              | 7%              |                  |                  | 7%               | 7%               | 7%               |
| Histidine metabolism                                | 7%              | 6%              | 6%              | 6%              | 5%              | 6%              |                  |                  | 6%               | 6%               | 6%               |
| Phenylalanine metabolism                            | 3%              | 3%              | 2%              | 2%              | 3%              | 3%              |                  |                  | 3%               | 3%               | 3%               |
| Valine, leucine and isoleucine degradation          | 3%              | 4%              | 4%              | 4%              | 3%              | 4%              |                  |                  | 4%               | 4%               | 4%               |
| Tyrosine metabolism                                 | 3%              | 3%              | 2%              | 2%              | 2%              | 2%              |                  |                  | 2%               | 2%               | 2%               |
| Tryptophan metabolism                               | 1%              | 1%              | 1%              | 1%              | 2%              | 2%              |                  |                  | 2%               | 2%               | 2%               |
| Lysine degradation                                  | 1%              | 1%              | 1%              | 1%              | 1%              | 1%              |                  |                  | 1%               | 1%               | 1%               |
| <b>Carbohydrate metabolism</b>                      |                 |                 |                 |                 |                 |                 |                  |                  |                  |                  |                  |
| Citrate cycle (TCA cycle)                           | 15%             | 15%             | 16%             | 16%             | 14%             | 16%             |                  |                  | 16%              | 16%              | 16%              |
| Glycolysis / Gluconeogenesis                        | 14%             | 13%             | 11%             | 11%             | 14%             | 13%             |                  |                  | 13%              | 13%              | 13%              |
| Pyruvate metabolism                                 | 12%             | 11%             | 11%             | 11%             | 12%             | 10%             |                  |                  | 10%              | 10%              | 10%              |
| Amino sugar and nucleotide sugar metabolism         | 9%              | 9%              | 10%             | 10%             | 10%             | 11%             |                  |                  | 11%              | 11%              | 11%              |
| Butanoate metabolism                                | 8%              | 8%              | 8%              | 8%              | 8%              | 8%              |                  |                  | 8%               | 8%               | 8%               |
| Propanoate metabolism                               | 8%              | 7%              | 7%              | 7%              | 9%              | 7%              |                  |                  | 7%               | 7%               | 7%               |
| C5-Branched dibasic acid metabolism                 | 8%              | 9%              | 10%             | 10%             | 7%              | 10%             |                  |                  | 10%              | 10%              | 10%              |
| Fructose and mannose metabolism                     | 5%              | 5%              | 5%              | 5%              | 4%              | 4%              |                  |                  | 4%               | 4%               | 4%               |
| Glyoxylate and dicarboxylate metabolism             | 5%              | 6%              | 6%              | 6%              | 5%              | 5%              |                  |                  | 5%               | 5%               | 5%               |
| Pentose phosphate pathway                           | 5%              | 5%              | 5%              | 5%              | 5%              | 4%              |                  |                  | 4%               | 4%               | 4%               |
| Pentose and glucuronate interconversions            | 4%              | 4%              | 4%              | 4%              | 4%              | 5%              |                  |                  | 5%               | 5%               | 5%               |
| Starch and sucrose metabolism                       | 3%              | 3%              | 3%              | 3%              | 3%              | 2%              |                  |                  | 2%               | 2%               | 2%               |
| Galactose metabolism                                | 2%              | 2%              | 2%              | 2%              | 2%              | 2%              |                  |                  | 2%               | 2%               | 2%               |
| Inositol phosphate metabolism                       | 2%              | 2%              | 2%              | 2%              | 2%              | 2%              |                  |                  | 2%               | 2%               | 2%               |
| Ascorbate and aldarate metabolism                   | 0%              | 0%              | 0%              | 0%              | 1%              | 1%              |                  |                  | 1%               | 1%               | 1%               |
| <b>Energy metabolism</b>                            |                 |                 |                 |                 |                 |                 |                  |                  |                  |                  |                  |
| Methane metabolism                                  | 61%             | 64%             | 68%             | 68%             | 52%             | 69%             |                  |                  | 69%              | 69%              | 69%              |
| Carbon fixation pathways in prokaryotes             | 16%             | 14%             | 12%             | 12%             | 17%             | 12%             |                  |                  | 12%              | 12%              | 12%              |
| Oxidative phosphorylation                           | 8%              | 9%              | 8%              | 8%              | 16%             | 8%              |                  |                  | 8%               | 8%               | 8%               |
| Nitrogen metabolism                                 | 8%              | 7%              | 7%              | 7%              | 6%              | 6%              |                  |                  | 6%               | 6%               | 6%               |
| Carbon fixation in photosynthetic organisms         | 6%              | 5%              | 4%              | 4%              | 8%              | 4%              |                  |                  | 4%               | 4%               | 4%               |
| Sulfur metabolism                                   | 1%              | 1%              | 0%              | 0%              | 1%              | 2%              |                  |                  | 2%               | 2%               | 2%               |
| Photosynthesis                                      | 0%              | 0%              | 0%              | 0%              | 0%              | 0%              |                  |                  | 0%               | 0%               | 0%               |
