# Supplementary material for: Microbial co-occurrence patterns in deep Precambrian bedrock fracture fluids
Source: Copernicus journal article supplement (doi:10.5194/bg-13-3091-2016), 2016-05-30
Supplement: Supplementary file 2 [file bg-13-3091-2016-supplement.zip]

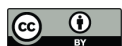

## *Supplement of*

# **Microbial co-occurrence patterns in deep Precambrian bedrock fracture fluids**

**Lotta Purkamo et al.**

*Correspondence to:* Lotta Purkamo (lotta.purkamo@gmail.com)

- bg-13-3091-2016-supplement-title-page.pdf
- SupplTable2.zip
- SupplTable3\_revised.zip
- SupplementaryInformation\_revised.pdf

The copyright of individual parts of the supplement might differ from the CC-BY 3.0 licence.
